# Supplementary material for: Retrospective analysis of 1,641 cases of classic fever of unknown origin
Source: PubMed Central journal article supplement — Ann Transl Med. 2020 Jun;8(11):690. doi: 10.21037/atm-20-3875 (PMC7327343; doi:10.21037/atm-20-3875), 2020-06
Supplement: atm-08-11-690-dss.pdf [file atm-08-11-690-dss.pdf]

## Data Sharing Statement

|                     |                                                                                                                                                    |                                                                                                                                                                                                                                                 |
|---------------------|----------------------------------------------------------------------------------------------------------------------------------------------------|-------------------------------------------------------------------------------------------------------------------------------------------------------------------------------------------------------------------------------------------------|
| <b>Article Info</b> | <a href="http://dx.doi.org/10.21037/atm-20-3875">http://dx.doi.org/10.21037/atm-20-3875</a>                                                        |                                                                                                                                                                                                                                                 |
| <b>Item</b>         | <b>Question</b>                                                                                                                                    | <b>Authors' Response<br/>(place "-" if not applicable)</b>                                                                                                                                                                                      |
| 1                   | Would you like to share data collected for your study to others?                                                                                   | No.                                                                                                                                                                                                                                             |
| 2                   | If not, would you like to share the reason for your decision?                                                                                      | This is a retrospective clinical study. The data is extracted from the information center of West China Hospital of Sichuan University. It involves patient privacy and hospital information security, so the original data cannot be provided. |
| 3                   | What data in particular will be shared?                                                                                                            | -                                                                                                                                                                                                                                               |
| 4                   | Any other documents will be share? Such as study protocol, statistical analysis plan, informed consent form, clinical study report, analytic code. | Yes.                                                                                                                                                                                                                                            |
| 5                   | When will data availability begin?                                                                                                                 | From the date of publication.                                                                                                                                                                                                                   |
| 6                   | When will data availability end?                                                                                                                   | Can always share.                                                                                                                                                                                                                               |
| 7                   | To whom will you share the data?                                                                                                                   | -                                                                                                                                                                                                                                               |
| 8                   | For what type of analysis or purpose?                                                                                                              | Can collaborate with us in research.                                                                                                                                                                                                            |
| 9                   | How or where can the data/documents be obtained?                                                                                                   | By e-mail                                                                                                                                                                                                                                       |
| 10                  | Any other restrictions?                                                                                                                            | None.                                                                                                                                                                                                                                           |
